# Supplementary material for: Low Doses of PFOA Promote Prostate and Breast Cancer Cells Growth through Different Pathways
Source: MDPI journal article supplement (doi:10.3390/ijms23147900), 2022-07-18
Supplement: s1 [file s1]

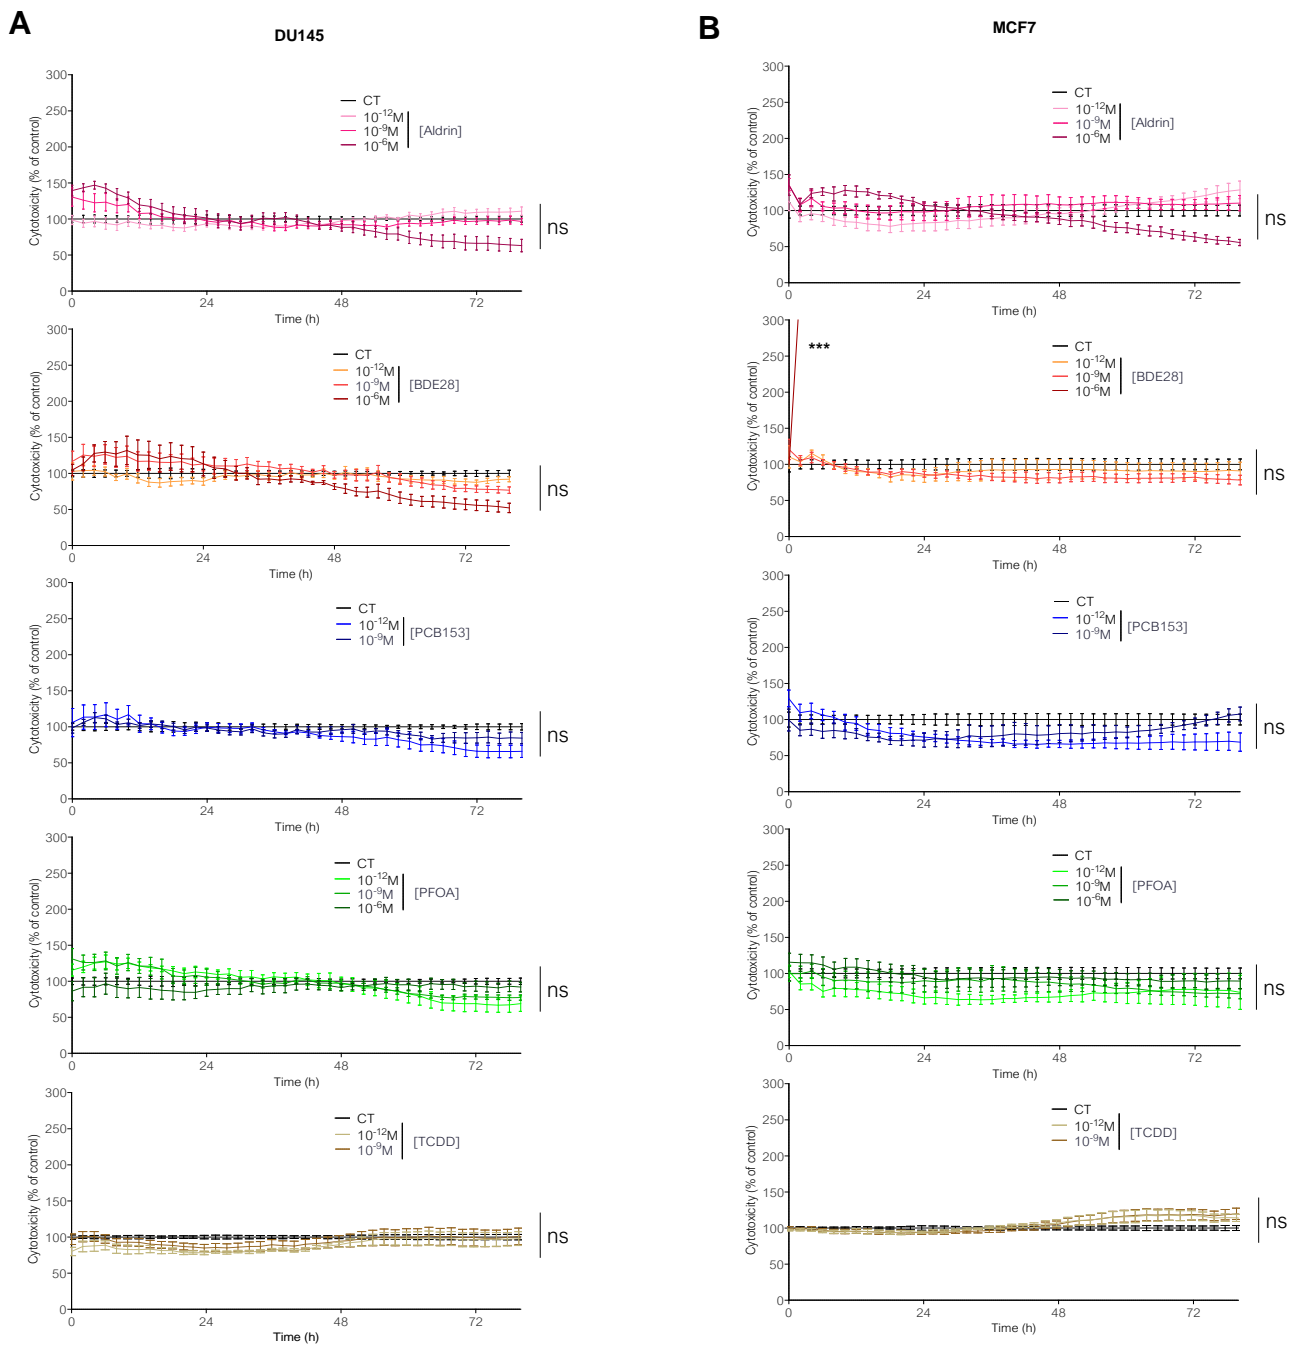

**Figure S1:** IncuCyte® cytotoxicity assay of **(A)** DU145 and **(B)** MCF7 after treatment of 80h with either Aldrin ( $10^{-12}\text{M}$ ,  $10^{-9}\text{M}$  or  $10^{-6}\text{M}$ ), BDE28( $10^{-12}\text{M}$ ,  $10^{-9}\text{M}$  or  $10^{-6}\text{M}$ ), PCB153( $10^{-12}\text{M}$  or  $10^{-9}\text{M}$ ), PFOA( $10^{-12}\text{M}$ ,  $10^{-9}\text{M}$  or  $10^{-6}\text{M}$ ) or TCDD ( $10^{-12}\text{M}$  or  $10^{-9}\text{M}$ ) in comparison with cells treated with EtOH (CT). Each point represent a mean  $\pm$  SEM of triplicates. Three wells were used per replicates and 9 pictures were taken per well. One way anova compared to EtOH treated cells.

\* $p < 0,05$ ; \*\* $p < 0,005$ ; \*\*\* $p < 0,0005$

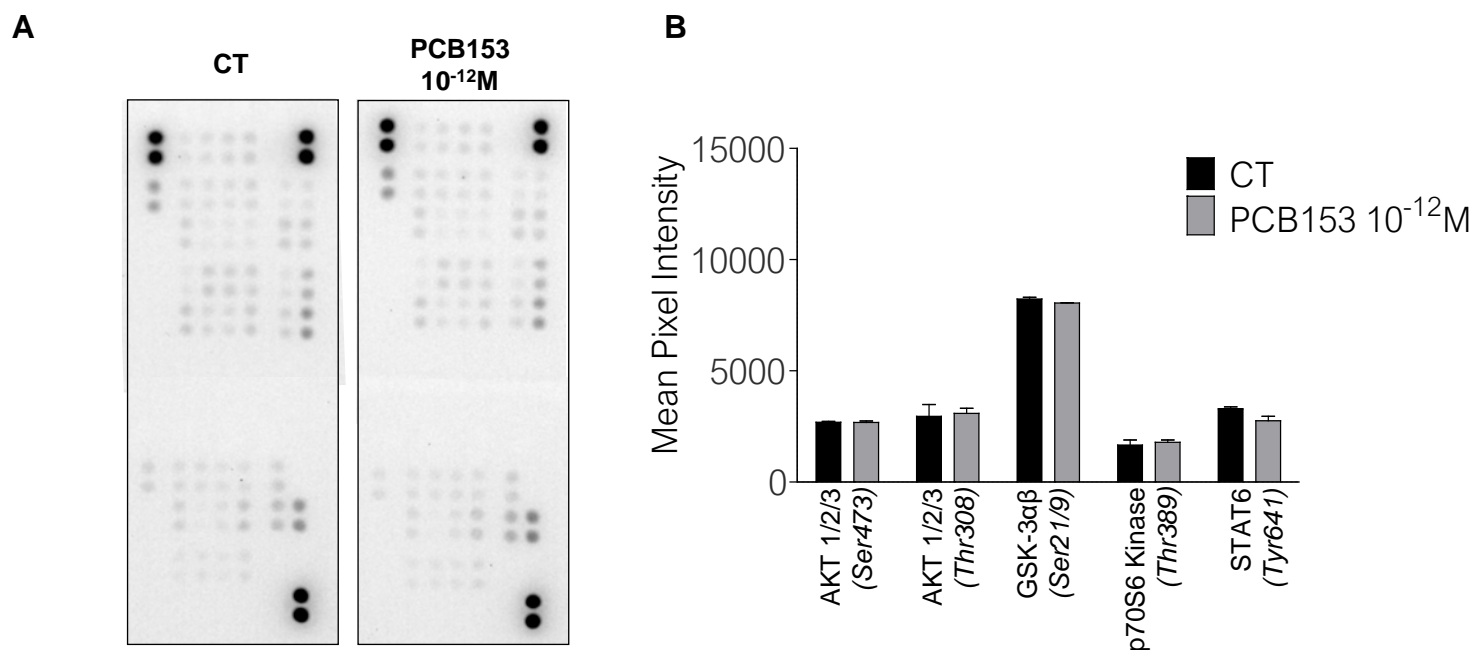

**Figure S2** Human Phospho-Kinase Array. Parallel determination of the relative levels of protein phosphorylation of a range of 43 kinase phosphorylation sites of DU145 after 48h of treatment of PCB153 ( $10^{-12}M$ ) in comparison with cells exposed with EtOH (CT) : **(A)** image and **(B)** quantification (no statistic test : two points each).

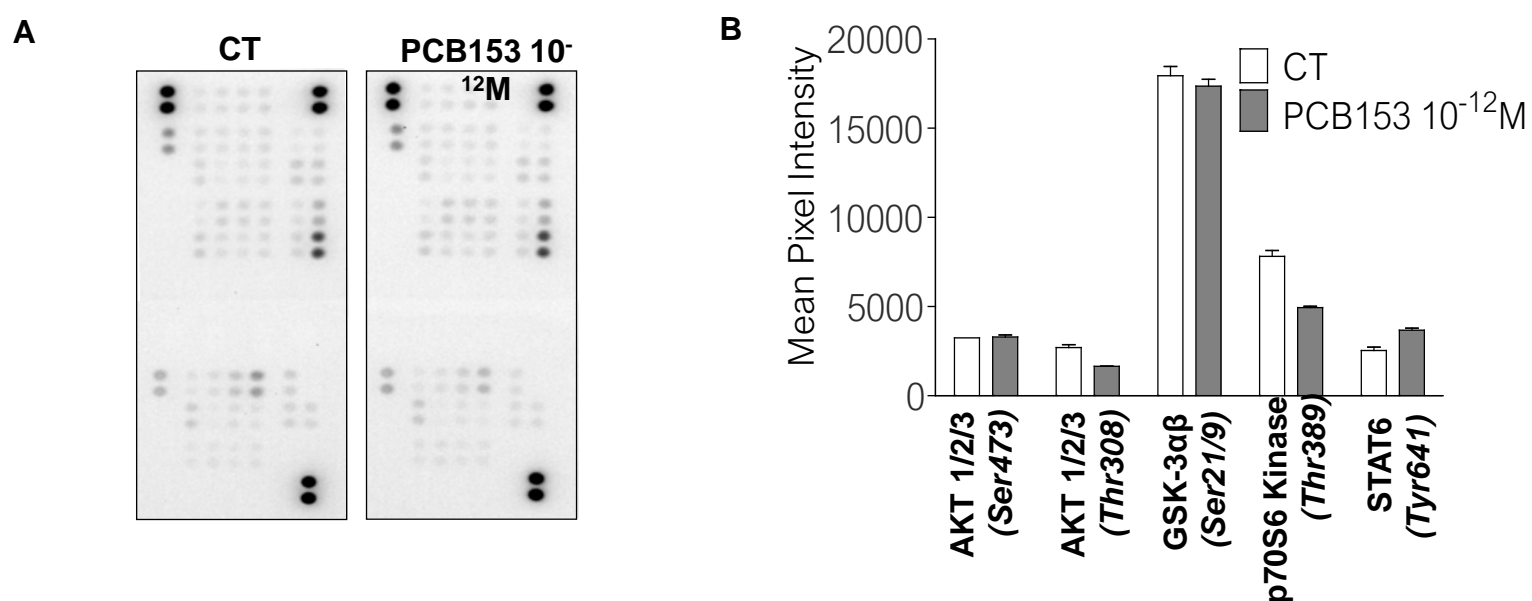

**Figure S3** Human Phospho-Kinase Array. Parallel determination of the relative levels of protein phosphorylation of a range of 43 kinase phosphorylation sites of MCF7 after 48h of treatment of PCB153 ( $10^{-12}M$ ) in comparison with cells exposed with EtOH (CT) : **(A)** image and **(B)** quantification (no statistic test : two points each).

A

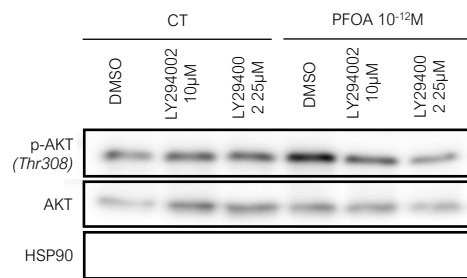

B

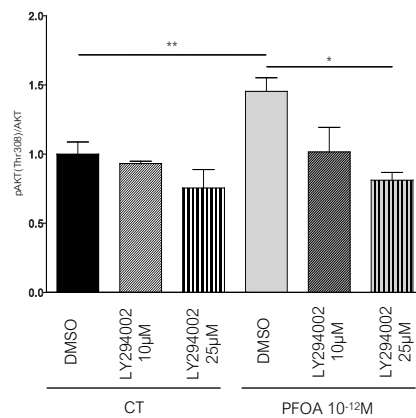

**Figure S4:** Western blot of phospho-AKT(Thr308), total AKT and HSP90 of MCF7 protein extract after 48h of treatment with PFOA ( $10^{-12}M$ ) and either DMSO, LY294002 (10µM or 25µM) overnight exposition. B) Quantification of protein level of three different western blot experiments. T test. \* $p<0,05$ ; \*\* $p<0,005$ ; \*\*\* $p<0,0005$

| Protein                                  | Source            | Identifier |
|------------------------------------------|-------------------|------------|
| pAKT (Ser473)                            | Cell Signaling    | 4058       |
| pAKT (Thr308)                            | Cell Signaling    | 4056       |
| AKT total                                | Cell Signaling    | 4685       |
| phopsho-GSK3 $\alpha$ $\beta$ (Ser21/9), | Cell Signaling    | 8566       |
| GSK3 $\alpha$ $\beta$ total              | Cell Signaling    | 5676       |
| phospho-p70S6Kinase (Thr389)             | Cell Signaling    | 9234       |
| p70S6Kinase total                        | Cell Signaling    | 2708       |
| HSP90                                    | Santa Cruz        | sc-13119   |
| Actine                                   | Fisher Scientific | MA5-15739  |

**Table S1** : List of antibodies used for Western Blot

| Gene     | Sequence (5' -> 3') |                         |
|----------|---------------------|-------------------------|
| PlexinD1 | F                   | AATGGGCGGAACATCGTCAAG   |
|          | R                   | CGAGACTGGTTGGAAACACAG   |
| RPLP0    | F                   | AGGTGTAATCCGTCTCCACAGA  |
|          | R                   | GCATCAGTACCCAATTCTATCAT |

**Table S2** : Primers used for RT-qPCR.
